# Supplementary material
Source: HighWire-hosted journal article supplement (https://www.annfammed.org/highwire/filestream/8294/field_highwire_adjunct_files/0/Sinsky_Supp_App_1.pdf)
Supplement: Sinsky_Supp_App_1.pdf [file Sinsky_Supp_App_1.pdf]

**Online Supplementary Material**

Sinsky CA, Willard-Grace R, Schutzbank AM, Sinsky TA, Margolius D, Bodenheimer T. In search of joy in practice: a report of 23 high-functioning primary care practices. *Ann Fam Med*. 2013;11(3):272-278.

<http://www.annfammed.org/content/11/3/272>

**Supplemental Appendix 1. Study Sites**

| Site                                     | Specialty       | Location                                   | Size                                           | Quality Measures | Key Innovations                                                                                                                                                                                                                                                        |
|------------------------------------------|-----------------|--------------------------------------------|------------------------------------------------|------------------|------------------------------------------------------------------------------------------------------------------------------------------------------------------------------------------------------------------------------------------------------------------------|
| <b>On-site Visits</b>                    |                 |                                            |                                                |                  |                                                                                                                                                                                                                                                                        |
| <b>Ambulatory Practice of the Future</b> | GIM             | Massachusetts General Hospital, Boston, MA | 2-Physician practice in IDS <sup>2</sup>       | MU, PQRS, PCMH   | Co-location of clinical staff; Open-space pod; wellness goal setting; Patients as full partners; health coach; virtual visits; comprehensive point-of-care laboratory testing; staff leadership and staff development—ie, all staff have protected time for innovation |
| <b>Brigham and Woman's Hospital</b>      | GIM             | Boston, MA                                 | 7-Physician satellite practice in large AMC    | MU, PCMH         | Co-location; extended care team (social worker, nutritionist, secondary care)                                                                                                                                                                                          |
| <b>Cleveland Clinic Strongsville</b>     | FM <sup>6</sup> | Strongsville, OH                           | 103-Physician multi-specialty satellite in IDS | MU, PQRS, PCMH   | 2 MAs to 1 physician; MA scribing                                                                                                                                                                                                                                      |
| <b>Clinica Family Health Services</b>    | FM              | Colorado                                   | 46-Clinician multisite FQHC                    | MU, PCMH         | Expanded MA role, including condition specific HPIs and mental health/substance abuse screening; RN management of conditions by standing order; co-located teams; extended care teams with behavioral health and warm handoffs                                         |
| <b>Clinic Ole</b>                        | FM              | Napa, CA                                   | 15-Physician clinic in FQHC network            | MU, PCMH         | Stable teamlets; expanded MA role work flow mapping                                                                                                                                                                                                                    |
| <b>Fairview Rosemont Clinic</b>          | GIM/FM          | Minneapolis, Minnesota                     | 2-Physician satellite in IDS                   | MU, PQRS, PCMH   | Previsit phone call; co-location, expanded MA role; in-box management; standard work; RN care coordination, social work, pharmacy covisits; spiritual/health coach (1 day per week)                                                                                    |
| <b>Group Health Olympia</b>              | FM              | Olympia, WA                                | 36-Physician satellite in IDS                  | MU, PCMH         | Virtual visits replace some face-to-face visits; smaller panel sizes; 2 office visits/hr; registry-based in-reach and out-reach                                                                                                                                        |

Online Supplementary Data

<http://www.annfammed.org/content/11/3/272/DC1>

| Site                                       | Specialty | Location                           | Size                                                                          | Quality Measures | Key Innovations                                                                                                                                                                                                                   |
|--------------------------------------------|-----------|------------------------------------|-------------------------------------------------------------------------------|------------------|-----------------------------------------------------------------------------------------------------------------------------------------------------------------------------------------------------------------------------------|
| <b>Harvard Vanguard Medford</b>            | GIM       | Medford, MA                        | 14-Physician satellite in private, multi-specialty clinic                     | MU, PQRS, PCMH   | Previsit laboratory testing; embedded behavioral health; process mapping; co-location of MD in flow stations; RN treatment algorithms for chronic illness management                                                              |
| <b>La Clinica de la Raza</b>               | FM        | Oakland, CA                        | 16-Clinician department in an FQHC, part of a community health center network | MU, PCMH         | MA panel managers                                                                                                                                                                                                                 |
| <b>Martin's Point-Evergreen Woods</b>      | GIM       | Bangor, ME                         | 4-Clinician practice in multi-site system                                     | MU, PCMH         | Expanded role for clinical support, RN collaborative care and case management; nurse scribing; huddles, practice retreat; in-box management                                                                                       |
| <b>Mayo Red Cedar</b>                      | FM        | Mayo Clinic Health Systems         | 13-Physician department in IDS                                                | MU               | 2 nurses to 1 physician teamlet; previsit laboratory testing; streamlined prescription management                                                                                                                                 |
| <b>Medical Associates Clinic</b>           | GIM       | Dubuque, IA                        | 115-Physician multi-specialty private practice                                | MU, PQRS, PCMH   | 2 nurses to 1 physician teamlet; previsit planning; streamlined prescription management; team meetings; in-box management                                                                                                         |
| <b>Mercy Clinics East</b>                  | FM        | Des Moines, IA                     | 7-Physician satellite in IDS                                                  | MU, PQRS, PCMH   | Health caches; shared medical decision making                                                                                                                                                                                     |
| <b>Multnomah County Health Department</b>  | IM        | Portland, OR                       | 40 Providers in multi-site network                                            | MU, PCMH         | Stable care teams; co-location; transparency of performance data; visual management of processes                                                                                                                                  |
| <b>Newport News Family Practice</b>        | FM        | Newport News, VA                   | 5-Physician site within multi-specialty private practice                      | MU, PQRS, PCMH   | 3 nurses to 1 physician teamlet; expanded nurse role; nurse scribing                                                                                                                                                              |
| <b>Quincy, Office of the Future</b>        | FM        | Quincy Family Practice, Quincy, IL | 2-Physician practice within 13 faculty family medicine residency program      | MU, PQRS, PCMH   | 2 MAs and 1 LPN per physician; previsit questionnaire; MA scribing and order entry                                                                                                                                                |
| <b>Sebastopol Community Health Centers</b> | FM        | Sonoma County, CA                  | 8-Clinician FQHC within a community health center network                     | MU, PCMH         | MA panel managers; expanded MA role; RN complex care managers; work flow mapping                                                                                                                                                  |
| <b>Southcentral Foundation</b>             | FM        | Anchorage, AK                      | 115-Physician customer-owned primary care clinic serving Native Americans     | MU, PQRS, PCMH   | 1 MA, 1 RN, 1 clerk, 1 provider teams; co-location; open-space pod; extended care team with behavioralist; warm handoffs; virtual visits for most chronic illness care; improvement facilitators; data driven improvement process |

Online Supplementary Data

<http://www.annfammed.org/content/11/3/272/DC1>

| Site                                                                                                                                                                                                                                                                                                                                                                                                                                                                              | Specialty | Location        | Size                                                       | Quality Measures | Key Innovations                                                                                                                                                                                                                                  |
|-----------------------------------------------------------------------------------------------------------------------------------------------------------------------------------------------------------------------------------------------------------------------------------------------------------------------------------------------------------------------------------------------------------------------------------------------------------------------------------|-----------|-----------------|------------------------------------------------------------|------------------|--------------------------------------------------------------------------------------------------------------------------------------------------------------------------------------------------------------------------------------------------|
| <b>ThedaCare</b>                                                                                                                                                                                                                                                                                                                                                                                                                                                                  | FM        | Oshkosh, WI     | 5-Physician satellite in a 150 physician IDS in rural WI   | MU, PQRS, PCMH   | Previsit planning; 15-minute laboratory turnaround; co-location of clinical and administrative staff; lean and data driven process improvement; printer in each examination room; standard procedure supply trays; standard room setup           |
| <b>University of Utah–Redstone</b>                                                                                                                                                                                                                                                                                                                                                                                                                                                | IM        | Park City, Utah | 5-Physician department in multi-specialty satellite in IDS | MU, PQRS, PCMH   | Expanded MA role; MA scribing; wireless communication technology; separate service and patient hallways (“on-stage, off-stage”); minimal waiting in reception (MA awaits patient arrival); printer in each examination room; standard room setup |
| <b>West Los Angeles VA</b>                                                                                                                                                                                                                                                                                                                                                                                                                                                        | IM        | Los Angeles, CA | 12 Providers in IDS                                        | PCMH             | Patient-aligned care teams; virtual visits                                                                                                                                                                                                       |
| <b>Virtual Visits</b>                                                                                                                                                                                                                                                                                                                                                                                                                                                             |           |                 |                                                            |                  |                                                                                                                                                                                                                                                  |
| <b>Allina–Cambridge</b>                                                                                                                                                                                                                                                                                                                                                                                                                                                           | FM/IM     | Cambridge, MN   |                                                            | MU, PQRS,        | 2 nurses to 1 physician; nurse scribing; streamlined prescription management                                                                                                                                                                     |
| <b>North Shore Physicians Group</b>                                                                                                                                                                                                                                                                                                                                                                                                                                               | FM/GIM    | Boston, MA      | 200-Physician multi-specialty clinic                       | MU, PQRS, PCMH   | Expanded MA role; flow stations (co-location of stable MA-MD teams); in-box management; nurse care managers; shared medical appointments                                                                                                         |
| <p>AMC = academic medical center; FM = family medicine; FQHC = Federally Qualified Health Clinic; GIM = general internal medicine; HPI = history of present illness; IDS = integrated delivery system; IM = internal medicine; LPN = licensed practical nurse; MA = medical assistant; MU = meaningful use; PCMH = patient-centered medical home; PQRS = Physician Quality Reporting Initiative; RN = registered nurse.</p> <p>Note: FQHCs are not eligible for PQRS program.</p> |           |                 |                                                            |                  |                                                                                                                                                                                                                                                  |
